# Supplementary material for: Accurate measurement of gene copy number for human alpha-defensin DEFA1A3
Source: PubMed Central journal article supplement (PMC4046698; doi:10.1186/1471-2164-14-719), 2013-10-20
Supplement: 12864_2013_5441_MOESM1_ESM.pdf [file 12864_2013_5441_MOESM1_ESM.pdf]

# 1 Additional File 1: Supplementary Information

## 2 3 Section 1: Details of measurement and analysis methods

### 4 (a) *Maximum-likelihood methods*

5 The maximum-likelihood approach to copy number determination we adopted was  
6 similar in its general structure to that used by Aldhous *et al.* for beta-defensins [1],  
7 and our rationale for adopting such an approach was two-fold. Firstly, we needed a  
8 way of combining information from different independent measures of *DEFA1A3*  
9 copy number. This was particularly important in allowing us to leverage the power of  
10 the allele ratio measurements, which we have found to have high empirical accuracy,  
11 presumably because allele ratios do not compare representation of the target  
12 sequence with another (reference) locus in the genome, but instead compare  
13 variants of the target sequence with each other. Nevertheless, allele ratio methods  
14 alone are not sufficient – a measured allele ratio of 2:1 is compatible with true copy  
15 numbers of 3, 6, 9 or any multiple of 3 – and PRTs (or some other method of fixing  
16 the approximate copy number relative to the genome as a whole) are necessary to  
17 arrive at a reliable copy number determination. If all the data were PRT  
18 measurements, we could simply combine the measurements as an average (or  
19 weighted average if differences in accuracy need to be taken into account); by  
20 contrast, allele ratios and PRTs are very different types of data, and likelihood  
21 evaluations allow us to combine them on an even basis.

22 The second rationale was that a likelihood approach would have a built-in method for  
23 evaluating the confidence that could be placed in an integer copy-number call.  
24 Although the distributions of error around each measurement are not known *a priori*,  
25 we have enough empirical data from samples of confidently-assigned copy number  
26 to model the expected distribution of measurements, and these can in turn be used  
27 to derive the probability of the observed measurement conditional on a particular true  
28 integer copy number. The distributions observed (see Supplementary Figure 1 for  
29 the PRT measurements) approximate quite well to a Gaussian, and despite a small  
30 excess of values at the extremes of some distributions (Supplementary Figures 1  
31 and 2), they fit well enough in the central range  $-2 < z < 2$  in which most observations  
32 are found that we adopted a Gaussian model as mathematically convenient.

### 33 34 (b) *Evaluating likelihoods*

35 For the PRT measurements, the probability of measuring the value observed  
36 assuming a true underlying copy number was determined assuming that PRT  
37 measurements of samples of true copy number  $N$  would have a Gaussian  
38 distribution with mean  $N$ , and a standard deviation estimated from repeated analysis

39 of samples of known copy number. Using a relatively small number of reference  
 40 standards allowed us to estimate standard deviations for PRT measurements that  
 41 gave useful analyses, but appeared to underestimate the standard deviations for all  
 42 copy-number classes relative to the data observed in a larger data set. Further  
 43 analysis of PRT measurements showed that higher standard deviations were  
 44 observed in analysis of many different samples of the same copy number relative to  
 45 repeated analysis of the same samples. We therefore increased the estimated  
 46 standard deviations to take account of this phenomenon, resulting in analyses that  
 47 were more internally consistent. This procedure was also conservative, in the sense  
 48 that it would act to underestimate the overall confidence in our integer copy number  
 49 calls. We have never observed a sample with a copy number of 2, and there are few  
 50 each of copy numbers above 11 in our dataset. For these copy numbers, standard  
 51 deviations were estimated by extrapolation from neighbouring values. The standard  
 52 deviations used in our analyses were:

| 53 | CN | MLT1A0 PRT | DEFA4 PRT |
|----|----|------------|-----------|
| 54 | 2  | 0.2        | 0.2       |
| 55 | 3  | 0.3        | 0.3       |
| 56 | 4  | 0.43       | 0.54      |
| 57 | 5  | 0.53       | 0.65      |
| 58 | 6  | 0.63       | 0.76      |
| 59 | 7  | 0.73       | 0.87      |
| 60 | 8  | 0.83       | 0.98      |
| 61 | 9  | 0.93       | 1.09      |
| 62 | 10 | 1.03       | 1.2       |
| 63 | 11 | 1.3        | 1.3       |
| 64 | 12 | 1.4        | 1.4       |
| 65 | 13 | 1.6        | 1.6       |
| 66 | 14 | 1.8        | 1.8       |
| 67 | 15 | 2          | 2         |
| 68 | 16 | 2.2        | 2.2       |
| 69 |    |            |           |

70 For the ratio methods, because the same copy number could be informatively  
 71 represented by many compatible integer splits (a copy number of 7 could be split  
 72 0:7, 1:6, 2:5, 3:4, 4:3, 5:2, 6:1 and 7:0) we analysed all possible splits for each copy  
 73 number, analysing for each copy number the split that best matched the observed  
 74 ratio. This best-fitting observed ratio was then expressed as a normalised ratio, the  
 75 ratio of the observed value relative to the expected; for example, a measured ratio of  
 76 1.8 and a MLCN of 6 (for which the best-fit integer ratio is 4:2, or a ratio of 2.0) would  
 77 generate a NR of 0.9. Normalised allele ratios appeared to have empirical  
 78 distributions that approximate well to Gaussian distributions (see below). Our data  
 79 allowed us to observe that ratio measurements for indel5 and DefHae3 had  
 80 normalised values that were consistently different from the expected mean value of

81 1.0 (see below), and the data allowed us to estimate standard deviations for the  
82 normalised values.

83

#### 84 (c) *Observed measurement distributions*

85 Supplementary Figure 1 shows the observed distributions of normalised ratio (NR)  
86 values, and Supplementary Figure 2 shows the quantile-quantile plots against a  
87 Gaussian distribution. For PRTs, the normalised value is the observed PRT  
88 measurement expressed relative to the maximum-likelihood copy number (MLCN,  
89 see below) for that sample. Thus a PRT measurement of 6.6 in a sample to which an  
90 MLCN of 6 was assigned would generate a normalised ratio of 1.1. For the allele  
91 ratios, the NR is the measured ratio expressed relative to the best-fitting integer split  
92 of the MLCN (see above).

93 Previous experience [2] had shown that the DefHae3 (*DEFA1:DEFA3*) ratio test had  
94 a tendency to overestimate the representation of *DEFA3* by about 10%. On average,  
95 samples with equal numbers of *DEFA1* and *DEFA3* genes would record a  
96 *DEFA1:DEFA3* ratio of about 0.92, which we assume is due to the generation of  
97 heteroduplex DNA that would fail to digest with *HaeIII* (see Supplementary Figure  
98 2d, below). In our analysis, we corrected for this bias by modelling a distribution of  
99 NR values with a mean of 0.918 rather than 1. Similarly, presumably because the  
100 shorter PCR product has a small amplification advantage relative to the longer one,  
101 the ratio of the deleted to undeleted forms of the indel5 variant has a mean of about  
102 1.05, which was used as the mean of the NR distribution.

103

#### 104 (d) *Minimum ratios as confidence measures*

105 We used the likelihood estimates to determine a measure of the confidence with  
106 which a MLCN was assigned – in some cases there would be multiple  
107 measurements strongly supporting the same MLCN, leading to high confidence,  
108 whereas in other cases some of the measures might be missing, uninformative or  
109 contradictory, leading to lower confidence in the best-supported single integer value  
110 for the MLCN. We defined the “minimum ratio” (MR) as the factor by which the  
111 likelihood associated with the MLCN exceeded the next best supported integer copy  
112 number. In our data, these MR values had a median value of 20.1 and an upper  
113 quartile value of 133.1, suggesting that most samples had a strongly supported  
114 MLCN, but there were also many samples with relatively low MRs (the lowest  
115 quartile value is 3.78). There was a strong association between low MR and missing  
116 or uninformative data – the 528 samples with four or five informative values out of  
117 the five possible measures (two PRTs and three ratios) had a median MR of 25.48,  
118 while the 61 samples with three or fewer informative measurements had a median  
119 MR of 4.65. A technically accurate ratio measurement can be uninformative if only

120 one of the two variants is present – this is particularly frequent for the DefHae3 ratio,  
121 for which about 10% of the population lack *DEFA3* [2]. Low MR was also strongly  
122 correlated with high copy number, presumably because of the increased difficulty in  
123 distinguishing neighbouring integer values; of the 336 samples with MLCN values  
124 between 3 and 7, the median MR was 93.51, whereas the 253 samples with MLCN  
125 of 8 or more had a median MR of 5.12.

126 In most cases the data supported an interpretation that all measurements were  
127 consistent with a single underlying copy number value, but we wanted to ensure that  
128 we were aware of any evidence that any of the tests was measuring a value  
129 genuinely inconsistent with the consensus. This might happen either because of  
130 variant repeats with altered representation of the measured sequences, unexpected  
131 SNP variation compromising the efficiency of PCR from particular targets, or  
132 because of copy number variation of reference loci in PRT assays. We therefore  
133 screened our analyses to identify any samples for which the relative P value for the  
134 MLCN (derived from integrating all measurements) was below 0.0005 for any  
135 individual test. Because we obtained five measures of copy number for each of more  
136 than 500 samples, we considered that a threshold of 1 in 2000 would allow us to  
137 identify any strong anomalies without creating too great a burden of false positives.

138 Inspection of the 7 samples (1.2%) highlighted as anomalous showed no recurrent  
139 pattern of discrepancy that explains most of the anomalies. All these samples did  
140 show unusually divergent values between the two PRT measurements, which might  
141 in principle indicate reference locus variation. We therefore retyped the PRTs for  
142 these samples, which yielded values on retyping that were more consistent with  
143 each other and with one of the previous PRT measurements. We would therefore  
144 suggest that our initial measurements of these samples represent extremes of  
145 random measurement variation, and are not evidence of uncommon genotypes that  
146 lead to systematic error in copy number evaluation.

147 One sample (NA12045) included in our sample set was known from other work [3] to  
148 carry a heterozygous deletion of *DEFA4*, such that the *DEFA4* PRT would be  
149 expected to return a copy number estimate (based on the assumption that two  
150 copies of *DEFA4* were present) of about twice the true value. This deletion was  
151 tracked using a PCR assay in CEPH pedigree 1346, and is found in the mother  
152 (CEPH 134602 = NA10852), her father (CEPH 134613 = NA12045) and four  
153 offspring. Although NA12045 is not highlighted as anomalous in this work by the  
154 analysis program, the *DEFA4* PRT does return a value (18.95) much higher than the  
155 *MLT1A0* PRT value (13.58); these measurements constitute the extreme outlier  
156 point at the top right of Figure 2. If this deletion of *DEFA4* were prevalent, it would  
157 compromise the general applicability of our combined PRT scheme for *DEFA1A3*  
158 copy number measurement. We therefore used the PCR-based assay to type the  
159 *DEFA4* deletion status of all samples flagged as anomalous in the analysis (see  
160 above) and samples with *DEFA4* PRT copy number values more than 1.4 times the  
161 *MLT1A0* value. We found no further examples of the *DEFA4* deletion, and conclude

162 that it is present at low frequency; even with incomplete ascertainment, since one  
163 heterozygous example was found in 589 unrelated individuals, the allele frequency is  
164 likely to be of the order of 0.001.

165 Our maximum likelihood analysis does not take into account any prior probabilities  
166 derived from known distributions of copy number within the population; this  
167 assumption of "flat priors" is necessary in this initial analysis, to avoid circularity of  
168 argument, but the analysis could be extended in future work by applying known  
169 frequencies of particular diploid copy number states as prior probabilities. This would  
170 have the effect of increasing the confidence of assignment (as measured by the  
171 Minimum Ratio) for the majority of common copy number states.

172 We applied the analysis procedure in the context of a custom program written in c++  
173 (source code available on request). In this context, the smallest positive number that  
174 can be represented as a double-precision variable is about  $10^{-308}$ , and probability  
175 values smaller than this are rounded to zero.

176

## 177 **Section 2: Comparison with other *DEFA1A3* CNV measurements**

178 We were able to compare our measurements with eight samples that were both part  
179 of our sample set and included in the CNV Genome Baseline Set of Complete  
180 Genomics [4]. As the read-depth most likely to correspond to *DEFA1A3* copy  
181 number, we selected sequence bins (chr8: 6822000-6828000, 6840000-6848000  
182 and 6860000-6866000) that included the gene sequences and surrounding  
183 sequences shared at high levels of sequence identity between the repeats on the  
184 human genome assembly (Build 36). The mean values across these intervals for  
185 median-scaled, GC-corrected read depth representation are shown relative to the  
186 corresponding MLCN values in Supplementary Table 1 below, and in Supplementary  
187 Figure 3.

188 The comparison with the microarray data of Campbell *et al.* used the values from  
189 their Table S7 for the "non-discrete" CNV defined by 52 probes in the interval  
190 chr8:6815835-6866374. There were 108 samples typed for that CNV by both  
191 Campbell *et al.* and in this study, with an  $r^2$  value of 0.49 between the different  
192 measures. A scatterplot of the results is shown as Supplementary Figure 4, below.  
193 Using publicly available intensity data for 17 samples common to both studies  
194 ([http://www.sanger.ac.uk/research/areas/humangenetics/cnv/highres\\_discovery.html](http://www.sanger.ac.uk/research/areas/humangenetics/cnv/highres_discovery.html)  
195 ) from the 42 million-element array-CGH data of Conrad *et al.* (2010), the median  
196  $\log_2$  ratio values across the three repeat intervals at chr8:6,822,000-6,828,000,  
197 chr8:6,840,000-6,848,000 and chr8:6,860,000-6,866,000 were compared with the  
198 MLCN from this study. A scatterplot of these comparisons is shown in  
199 Supplementary Figure 5 below ( $r^2 = 0.74$ ). Although we have not determined its copy  
200 number directly in this study, these comparisons are consistent with the reference  
201 sample NA10851 having a copy number of 7.

202 **Section 3: P values from GWAS studies**

203 After consulting with the relevant investigators, we interrogated 18 GWAS studies of  
204 infectious/inflammatory disorders for P values at SNP loci associated with *DEFA1A3*  
205 copy number, and Supplementary Table 3 below summarises those findings. In  
206 addition to the GWAS studies of inflammatory conditions specifically interrogated in  
207 that approach, further P values for rs4300027, rs4512398 and rs7825750 can be  
208 obtained by searching GWAS Central (<http://www.gwascentral.org/index>). In total,  
209 152 entries were found in GWAS Central for P values involving these SNPs. Among  
210 these 152 entries, there were 6 examples of P values below 0.05:

| 211 | <b>SNP</b> | <b>P value</b> | <b>phenotype</b>              | <b>GWAS Central ID</b> |
|-----|------------|----------------|-------------------------------|------------------------|
| 212 | rs4512398  | 0.007237       | Rheumatoid arthritis          | HGVST185               |
| 213 | rs4512398  | 0.008682       | Parkinson's disease           | HGVST6                 |
| 214 | rs7825750  | 0.0174983      | Systolic blood pressure       | HGVST307               |
| 215 | rs4512398  | 0.02662        | Parkinson's disease           | HGVST6                 |
| 216 | rs4512398  | 0.03606        | Rheumatoid arthritis          | HGVST185               |
| 217 | rs4300027  | 0.03989        | Amyotrophic lateral sclerosis | HGVST65                |
| 218 |            |                |                               |                        |

219 The first and fifth entries, and the second and fourth, are variant analyses of the  
220 same SNP in the same data set, and are therefore not independent. These include  
221 no examples of P values that are of clear significance given the number of values  
222 considered overall. Taken together the P values from non-duplicate SNP analyses  
223 conform well to the expectation for 87 values randomly distributed between 0 and 1  
224 (see Supplementary Figure 6, below).

225

226

227 **Supplementary Tables**

228 **Supplementary Table 1**

229 *DEFA1A3* MLCN (this study) and median-scaled, GC-corrected read depth  
 230 (Complete Genomics) for eight samples common to both studies.

231

| sample  | MLCN | read depth |
|---------|------|------------|
| NA06985 | 7    | 2.26       |
| NA06994 | 6    | 1.94       |
| NA07357 | 10   | 3.33       |
| NA12004 | 7    | 2.27       |
| NA12889 | 10   | 2.87       |
| NA12890 | 5    | 1.69       |
| NA12891 | 5    | 1.73       |
| NA12892 | 7    | 2.51       |

232

233

234 **Supplementary Table 2**

235 New reference standards used in this study. “CEPH family ID” is given for those  
 236 samples which have been validated not only via repeated concordant measurements  
 237 against previous reference samples (of copy number deduced from restriction  
 238 fragment lengths established by Southern blotting of pulsed-field gels), but also from  
 239 segregation of haplotypes established via segregation in three-generation CEPH  
 240 pedigrees. These particular copy number values can therefore be regarded as very  
 241 strongly established.

| <b>Sample</b> | <b><i>DEFA1A3</i><br/>CN</b> | <b>Source</b> | <b>CEPH<br/>family ID</b> |
|---------------|------------------------------|---------------|---------------------------|
| C0007         | 7                            | ECACC HRC1    |                           |
| C0075         | 6                            | ECACC HRC1    |                           |
| C0150         | 8                            | ECACC HRC1    |                           |
| C0877         | 9                            | ECACC HRC1    |                           |
| NA07062       | 5                            | CEPH          | 1340-3                    |
| NA11998       | 6                            | CEPH          | 1420-4                    |
| NA07008       | 7                            | CEPH          | 1340-5                    |

242

243

244 **Supplementary Table 3**

245 Summary of P values for *DEFA1A3* CNV-associated SNPs in 18 independent GWAS studies  
 246 of inflammatory or infectious disorders. In the single instance of a nominally significant point  
 247 P value ( $P_{obs} < 0.05$ ), the adjusted P value ( $P_{corr}$ ) is shown using a Bonferroni correction for  
 248 the 18 different studies analysed:  $P_{corr} = 1 - [(1 - P_{obs})^N]$ , where N is the number of tests,  
 249 which approximates to  $NP_{obs}$  when N is large and  $P_{obs}$  small.

250

251 Phenotype SNP  $P_{obs}$   $P_{corr}$  Reference

252 **WTCCC**

|     |                         |           |        |      |      |
|-----|-------------------------|-----------|--------|------|------|
| 253 | Bipolar disorder        | rs7825750 | 0.529  |      | [5]  |
| 254 | Coronary artery disease | rs7825750 | 0.555  |      | [5]  |
| 255 | Crohn's disease         | rs7825750 | 0.168  |      | [5]  |
| 256 | Hypertension            | rs7825750 | 0.660  |      | [5]  |
| 257 | Rheumatoid arthritis    | rs7825750 | 0.365  |      | [5]  |
| 258 | Type 1 diabetes         | rs7825750 | 0.201  |      | [5]  |
| 259 | Type 2 diabetes         | rs7825750 | 0.191  |      | [5]  |
| 260 |                         |           |        |      |      |
| 261 | Coeliac Disease         | rs4512398 | 0.013  | 0.21 | [6]  |
| 262 | type 1 diabetes         | rs4512398 | >0.05  |      | [7]  |
| 263 |                         | rs4300027 | >0.05  |      | [7]  |
| 264 | Ulcerative colitis      | rs4512398 | 0.8    |      | [8]  |
| 265 |                         | rs4300027 | 0.71   |      | [8]  |
| 266 | Crohn's Disease         | rs4512398 | 0.525  |      | [9]  |
| 267 | IBD                     | rs4512398 | >0.05  |      | [10] |
| 268 |                         | rs4300027 | >0.05  |      | [10] |
| 269 | Psoriasis               | rs4512398 | 0.2    |      | [11] |
| 270 | Psoriasis               | rs4300027 | 0.49   |      | [12] |
| 271 |                         | rs4512398 | 0.926  |      | [12] |
| 272 | Atopic Dermatitis       | rs7825750 | >0.05  |      | [13] |
| 273 | Multiple Sclerosis      | rs7825750 | 0.5904 |      | [14] |
| 274 | HIV progression         | rs4300027 | 0.946  |      | [15] |
| 275 |                         | rs4512398 | 0.783  |      | [15] |
| 276 |                         | rs7825750 | 0.79   |      | [15] |
| 277 | CF severity             | rs4300027 | 0.10   |      | [16] |
| 278 |                         | rs4512398 | 0.12   |      | [16] |

279

280



281 **Supplementary Figures**

282

283 **Supplementary Figure 1**

284 Normalised Ratio (=measurement/MLCN) distributions for (a) MLT1A0 and (b)  
285 DEFA4 PRTs.

286 (a)

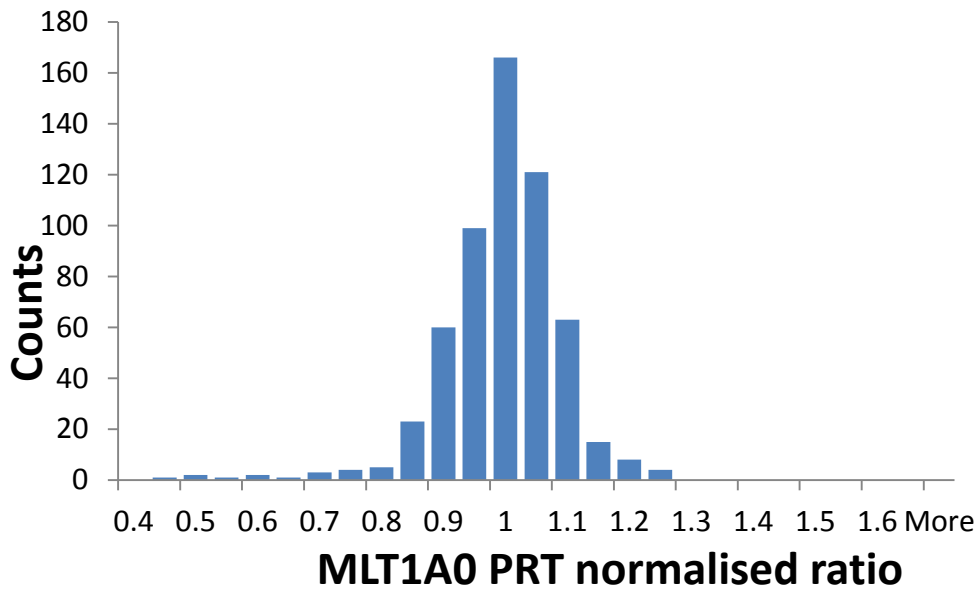

287

288 (b)

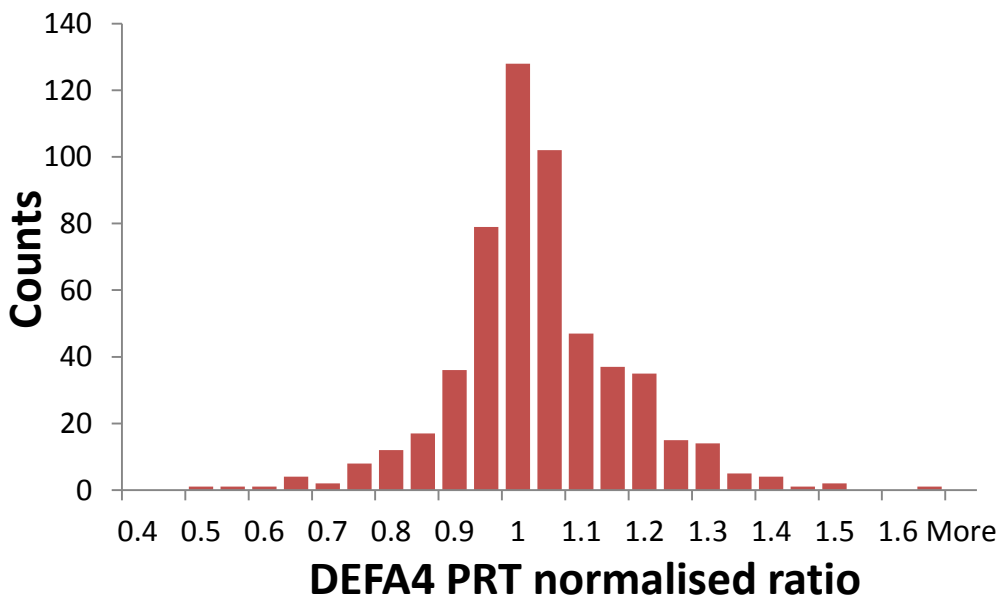

289

290

291 **Supplementary Figure 2**

292 QQ plots of NR relative to a Gaussian distribution for all 5 measures: (a) MLT1A0  
293 PRT, (b) DEFA4 PRT, (c) indel5 ratios, (d) DefHae3 (*DEFA1:DEFA3*) ratios and (e)  
294 7bp duplication ratios. For a given MLCN, in (c)-(e) there will more than one possible  
295 split of variants consistent with the integer total, and the ratio that most closely  
296 matches the observed value has been used.

297 (a)

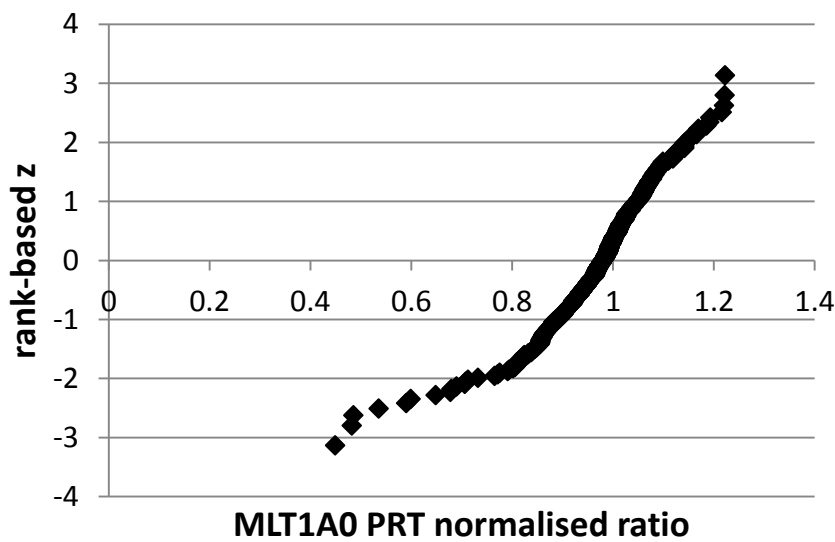

298

299 (b)

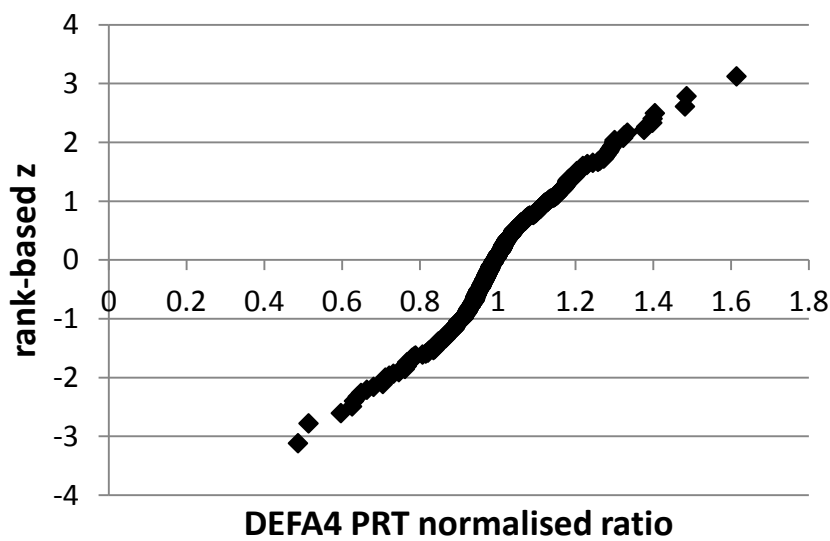

300

301

302 (c)

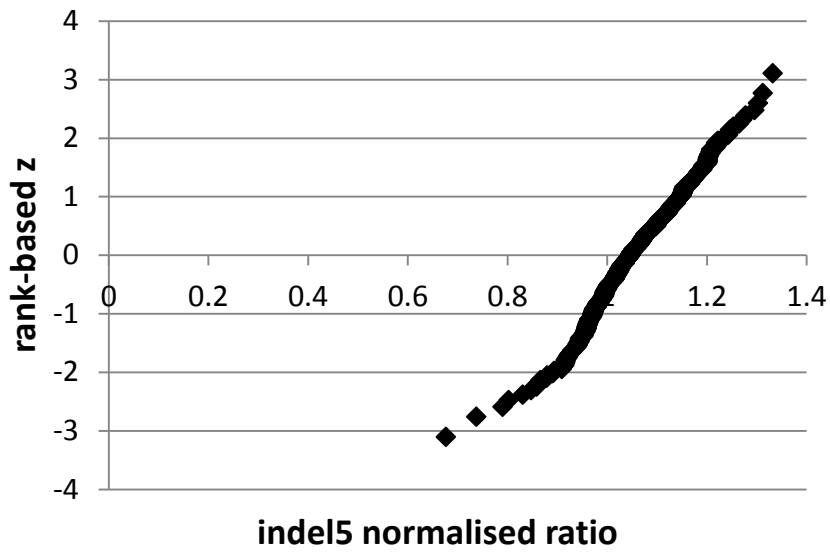

303

304 (d)

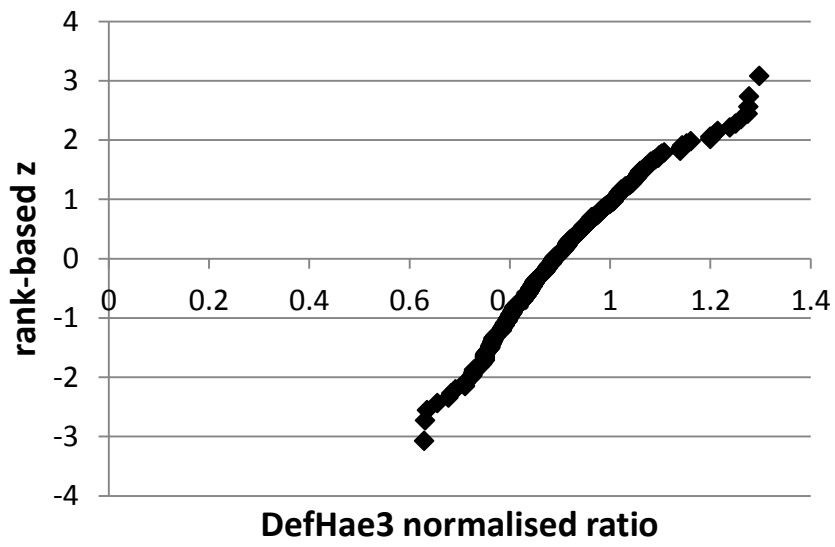

305

306

307 (e)

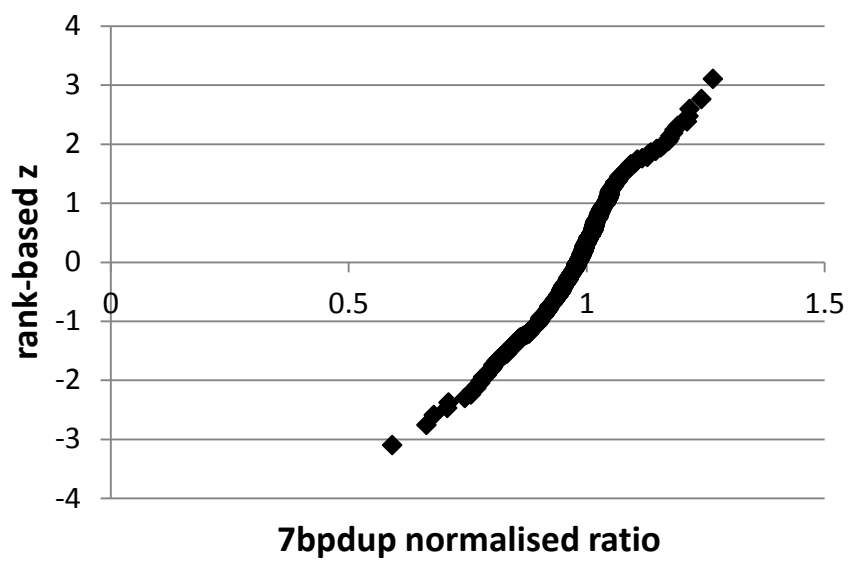

308

309

310

311 **Supplementary Figure 3**

312 *DEFA1A3* MLCN (this study) plotted against median-scaled, GC-corrected read  
313 depth (Complete Genomics) for eight samples common to both studies (see also  
314 Supplementary Table 1).

315

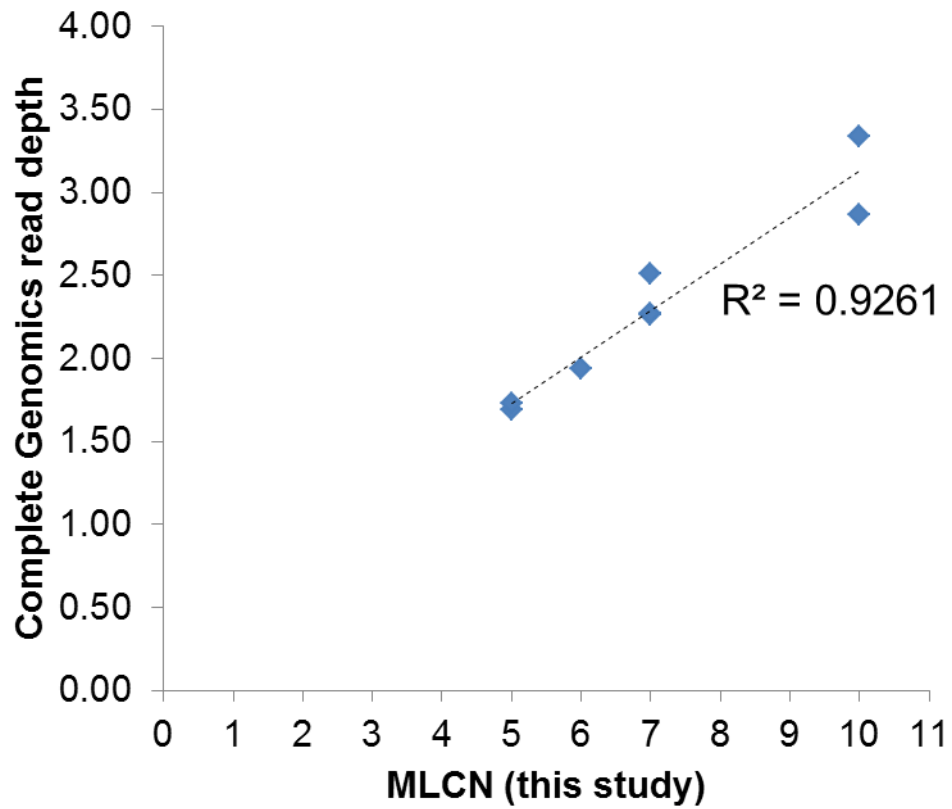

316

317

318 **Supplementary Figure 4**

319 Scatterplot comparing the MLCN values in this study with the microarray data of  
320 Campbell *et al.* (their Table S7, chr8:6815835-6866374) for 108 HapMap samples  
321 typed in both studies ( $r^2 \approx 0.49$ ).

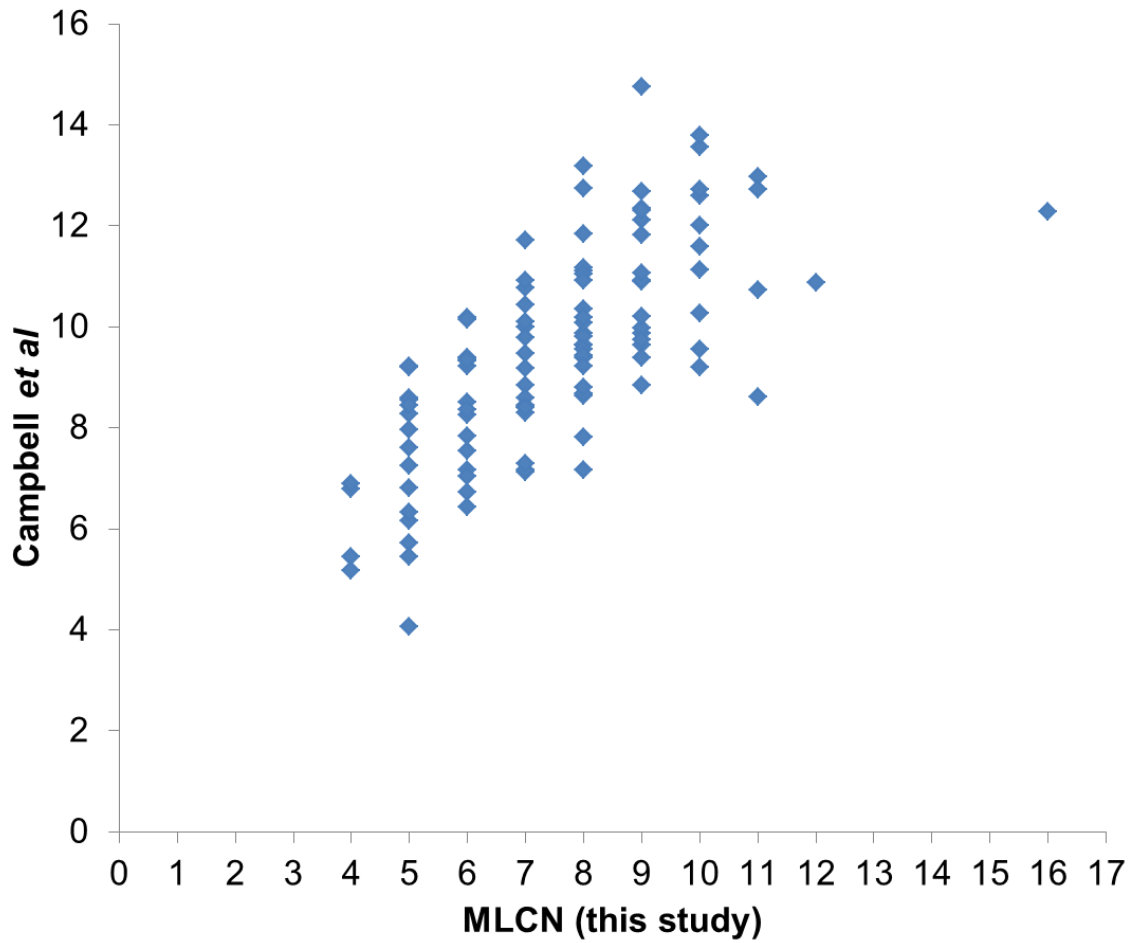

322

323

324

325 **Supplementary Figure 5**

326 Comparison between intensity data from Conrad et al. (2010) from the *DEFA1A3*  
327 CNV region for 17 samples and the MLCN from this study (see section 2 for details).  
328 The  $r^2$  value is 0.74.

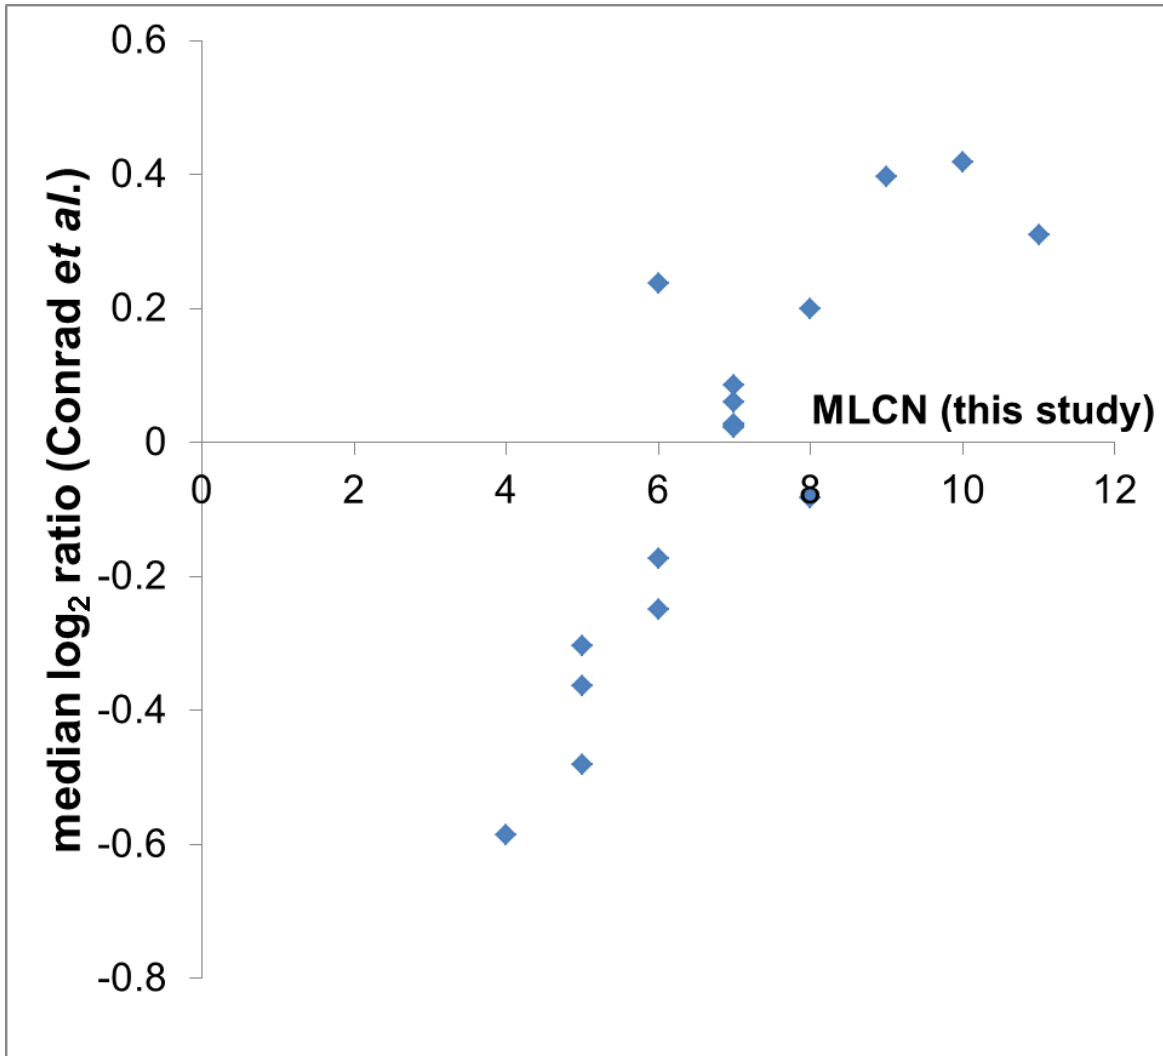

329

330

331 **Supplementary Figure 6**

332 Q-Q plot of all 87 non-duplicate P values for rs7825750, rs4300027 or rs4512398  
333 from GWAS Central. To avoid double-counting of non-independent data, this  
334 compilation removed duplicate analyses of the same SNP in the same data, in every  
335 case choosing the more significant P value. This over-conservative procedure is  
336 likely to have led to the observed general small excess of non-significant P values in  
337 the range above  $P = 0.05$  (i.e.,  $-\log_{10} P$  values below 1.3). Nevertheless, there is no  
338 indication of an excess of significant P values, and the overall pattern of P values  
339 observed is consistent with what would be expected from 87 numbers distributed  
340 randomly between 0 and 1.

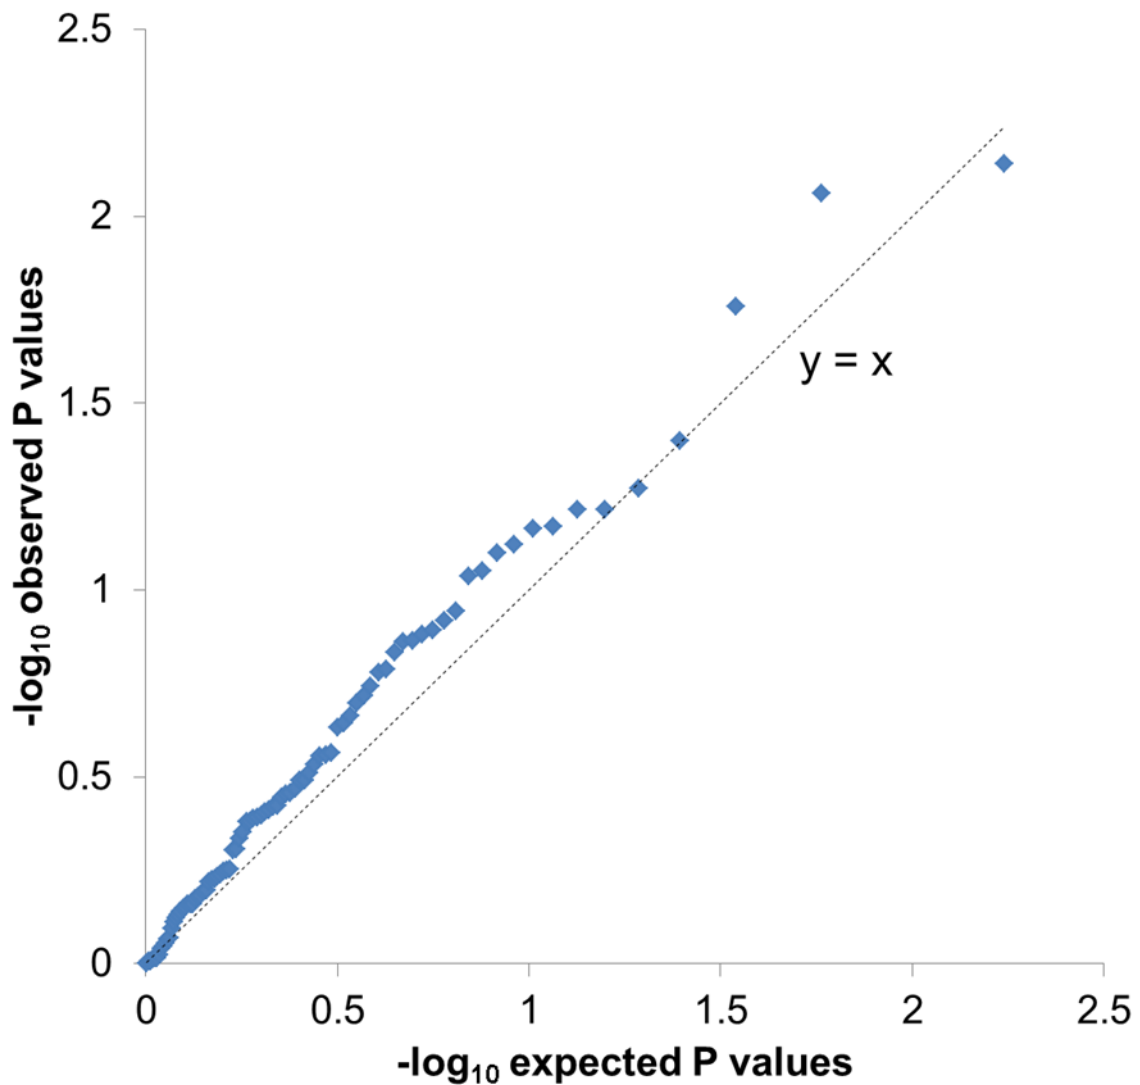

341

342

343



345 **References (Additional File 1)**

- 346 1. Aldhous MC, Abu Bakar S, Prescott NJ, Palla R, Soo K, Mansfield JC, Mathew CG,  
347 Satsangi J, Armour JAL: **Measurement methods and accuracy in copy number**  
348 **variation: failure to replicate associations of  $\beta$ -defensin copy number with**  
349 **Crohn's disease**. *Hum Mol Genet* 2010, **19**:4930-4938.
- 350 2. Aldred PMR, Hollox EJ, Armour JAL: **Copy number polymorphism and**  
351 **expression level variation of the human alpha-defensin genes DEFA1 and**  
352 **DEFA3**. *Hum Mol Genet* 2005, **14**(14):2045-2052.
- 353 3. Khan FF: **Characterization of the Alpha Defensin Copy Number Variation in**  
354 **Humans**. *PhD thesis*. University of Nottingham, School of Biology; 2012.
- 355 4. Drmanac R, Sparks AB, Callow MJ, Halpern AL, Burns NL, Kermani BG, Carnevali  
356 P, Nazarenko I, Nilsen GB, Yeung G *et al*: **Human Genome Sequencing Using**  
357 **Unchained Base Reads on Self-Assembling DNA Nanoarrays**. *Science* 2010,  
358 **327**(5961):78-81.
- 359 5. Wellcome Trust Case Control Consortium: **Genome-wide association study of**  
360 **14,000 cases of seven common diseases and 3,000 shared controls**. *Nature*  
361 2007, **447**:661-678.
- 362 6. Dubois PCA, Trynka G, Franke L, Hunt KA, Romanos J, Curtotti A, Zhernakova A,  
363 Heap GAR, Adany R, Aromaa A *et al*: **Multiple common variants for celiac**  
364 **disease influencing immune gene expression**. *Nat Genet* 2010, **42**(4):295-302.
- 365 7. Hakonarson H, Grant SFA, Bradfield JP, Marchand L, Kim CE, Glessner JT, Grabs  
366 R, Casalunovo T, Taback SP, Frackelton EC *et al*: **A genome-wide association**  
367 **study identifies KIAA0350 as a type 1 diabetes gene**. *Nature* 2007,  
368 **448**(7153):591-594.
- 369 8. Silverberg MS, Cho JH, Rioux JD, McGovern DPB, Wu J, Annesse V, Achkar J-P,  
370 Goyette P, Scott R, Xu W *et al*: **Ulcerative colitis-risk loci on chromosomes 1p36**  
371 **and 12q15 found by genome-wide association study**. *Nat Genet* 2009, **41**(2):216-  
372 220.
- 373 9. Barrett JC, Hansoul S, Nicolae DL, Cho JH, Duerr RH, Rioux JD, Brant SR,  
374 Silverberg MS, Taylor KD, Barmada MM *et al*: **Genome-wide association defines**  
375 **more than 30 distinct susceptibility loci for Crohn's disease**. *Nat Genet* 2008,  
376 **40**(8):955-962.
- 377 10. Kugathasan S, Baldassano RN, Bradfield JP, Sleiman PMA, Imielinski M, Guthery  
378 SL, Cucchiara S, Kim CE, Frackelton EC, Annaiah K *et al*: **Loci on 20q13 and**  
379 **21q22 are associated with pediatric-onset inflammatory bowel disease**. *Nat*  
380 *Genet* 2008, **40**(10):1211-1215.
- 381 11. Capon F, Bijlmakers M-J, Wolf N, Quaranta M, Huffmeier U, Allen M, Timms K,  
382 Abkevich V, Gutin A, Smith R *et al*: **Identification of ZNF313/RNF114 as a novel**  
383 **psoriasis susceptibility gene**. *Hum Mol Genet* 2008, **17** 1938-1945.
- 384 12. Liu Y, Helms C, Liao W, Zaba LC, Duan S, Gardner J, Wise C, Miner A, Malloy MJ,  
385 Pullinger CR *et al*: **A Genome-Wide Association Study of Psoriasis and Psoriatic**  
386 **Arthritis Identifies New Disease Loci**. *PLoS Genet* 2008, **4**(4):e1000041.
- 387 13. Esparza-Gordillo J, Weidinger S, Folster-Holst R, Bauerfeind A, Ruschendorf F,  
388 Patone G, Rohde K, Marenholz I, Schulz F, Kerscher T *et al*: **A common variant on**  
389 **chromosome 11q13 is associated with atopic dermatitis**. *Nat Genet* 2009,  
390 **41**(5):596-601.
- 391 14. International Multiple Sclerosis Genetics Consortium, Hafler DA, Compston A,  
392 Sawcer S, Lander ES, Daly MJ, De Jager PL, de Bakker PI, Gabriel SB, Mirel DB *et*  
393 *al*: **Risk alleles for multiple sclerosis identified by a genomewide study**. *The*  
394 *New England Journal of Medicine* 2007, **357**(9):851-862.

- 395 15. Fellay J, Ge D, Shianna KV, Colombo S, Ledergerber B, Cirulli ET, Urban TJ, Zhang  
396 K, Gumbs CE, Smith JP *et al*: **Common Genetic Variation and the Control of HIV-**  
397 **1 in Humans**. *PLoS Genet* 2009, **5**(12):e1000791.
- 398 16. Wright FA, Strug LJ, Doshi VK, Commander CW, Blackman SM, Sun L, Berthiaume  
399 Y, Cutler D, Cojocaru A, Collaco JM *et al*: **Genome-wide association and linkage**  
400 **identify modifier loci of lung disease severity in cystic fibrosis at 11p13 and**  
401 **20q13.2**. *Nat Genet* 2011, **43**(6):539-546.

402

403
